# Supplementary material for: Conditional expression of flagellar motility, curli fimbriae, and biofilms in Shiga toxin- producing Escherichia albertii
Source: Front Microbiol. 2024 Sep 9;15:1456637. doi: 10.3389/fmicb.2024.1456637 (PMC11420993; doi:10.3389/fmicb.2024.1456637)
Supplement: Supplementary Table 1 — E. albertii primary flagellar genes. [file Table_1.XLSX]

## Sheet: Table1
Gene	EDL933	MG1655	Product	RM9973	RM9974	RM9976	RM10507	RM10705	RM15112	RM15113	RM15114	RM15115	RM15116	2011C-4180	2012EL-1823B	2014C-4015	2014EL-1348	05-3106	07-3866	54-2045	2010C-3449	2013C-4143	2014C-4356
flgN	Z1708	b1070	Export chaperone for FlgK and FlgL	1	1	1	1	1	1	1	1	1	1	1	1	1	1	1	1	1	1	1	1
flgM	Z1709	b1071	Anti-sigma factor for FliA (sigma 28)	1	1	1	1	1	1	1	1	1	1	1	1	1	1	1	1	1	1	1	1
flgA	Z1710	b1072	Assembly protein for flagellar basal-body periplasmic P ring	1	1	1	1	1	1	1	1	1	1	1	1	1	1	1	1	1	1	1	1
flgB	Z1711	b1073	Flagellar component of cell-proximal portion of basal-body rod	1	1	1	1	1	1	1	1	1	1	1	1	1	1	1	1	1	1	1	1
flgC	Z1712	b1074	Flagellar component of cell-proximal portion of basal-body rod	1	1	1	1	1	1	1	1	1	1	1	1	1	1	1	1	1	1	1	1
flgD	Z1713	b1075	Flagellar hook assembly protein	1	1	1	1	1	1	1	1	1	1	1	1	1	1	1	1	1*	1	1	1
flgE	Z1714	b1076	Flagellar hook protein	1	1	1	1	1	1	1	1	1	1	1	1	1	1	1	1	1	1	1	1
flgF	Z1715	b1077	Flagellar component of cell-proximal portion of basal-body rod	1	1	1	1	1	1	1	1	1	1	1	1	1	1	1	1	1	1	1	1
flgG	Z1716	b1078	Flagellar component of cell-distal portion of basal-body rod	1	1	1	1	1	1	1*	1*	1	1	1	1	1	1	1	1	1*	1	1	1
flgH	Z1717	b1079	Flagellar protein of basal-body outer-membrane Lring	1	1	1	1	1	1	1	1	1	1	1	1	1	1	1	1	1	1	1	1
flgI	Z1718	b1080	Putative flagellar basal body protein	1	1	1	1	1	1*	1	1	1	1*	1	1	1	1	1	1	1	1	1	1
flgJ	Z1719	b1081	Flagellar rod assembly protein and murein hydrolase; flagellum-specific muramidase	1	1	1	1	1	1*	1*	1*	1*	1*	1	1	1*	1*	1	1	1	1	1	1
flgK	Z1720	b1082	Flagellar hook-filament junction protein 1	1	1	1	1	1	1	1*	1	1*	1	1	1	1	1	1	1	1	1	1	1
flgL	Z1721	b1083	Flagellar hook-filament junction protein	1	1	1	1	1	1	1	1	1	1	1	1	1	1	1	1	1	1	1	1
flhE	Z2931	b1878	Proton seal during flagellar secretion	1	1	1	1	1	1	1	1	1	1	1	1	1	1	1	1	1	1	1	1
flhA	Z2932	b1879	Putative flagellar export pore protein	1	1	1	1	1	1*	1*	1*	1*	1*	1	1	1	1	1	1	1	1*	1	1
flhB	Z2934	b1880	Flagellin export apparatus, substrate specificity protein	1	1	1	1	1	0	0	0	0	0	1	1	0	0	1	1	1	1	1	1
cheZ	Z2935	b1881	Regulator; Chemotaxis and mobility	0	0	0	0	0	0	0	0	0	0	0	0	0	0	0	0	0	0	0	0
cheY	Z2936	b1882	Chemotaxis regulator transmits chemoreceptor signals to flagelllar motor components	0	0	0	0	0	0	0	0	0	0	0	0	0	0	0	0	0	0	0	0
cheB	Z2937	b1883	Response regulator for chemotaxis (cheA sensor); protein methylesterase	0	0	0	0	0	0	0	0	0	0	0	0	0	0	0	0	0	0	0	0
cheR	Z2938	b1884	Response regulator for chemotaxis; protein glutamate methyltransferase	0	0	0	0	0	0	0	0	0	0	0	0	0	0	0	0	0	0	0	0
tap	Z2939	b1885	Methyl-accepting chemotaxis protein IV, peptide sensor receptor	0	0	0	0	0	0	0	0	0	0	0	0	0	0	0	0	0	0	0	0
tar	Z2940	b1886	Methyl-accepting chemotaxis protein II	0	0	0	0	0	0	0	0	0	0	0	0	0	0	0	0	0	0	0	0
cheW	Z2941	b1887	Purine-binding chemotaxis protein	0	0	0	0	0	0	0	0	0	0	0	0	0	0	0	0	0	0	0	0
cheA	Z2942	b1888	Sensory transducer kinase between chemo- signal receptors and CheB and CheY	0	0	0	0	0	0	0	0	0	0	0	0	0	0	0	0	0	0	0	0
motB	Z2943	b1889	Protein that enables flagellar motor rotation	1	1	1	1	1	0	0	0	0	0	1	1	0	0	1	1	1	1	1	1
motA	Z2944	b1890	Proton conductor component of flagella motor	1	1	1	1	1	0	0	0	0	0	1	1	0	0	1	1	1	1	1*	1
flhC	Z2945	b1891	Flagellar class II regulon transcriptional activator, with FlhD	1	1	1	1	1	0	0	0	0	0	1	1	0	0	1	1	1	1	1	1
flhD	Z2946	b1892	Flagellar class II regulon transcriptional activator, with FlhC	1	1	1	1	1	0	0	0	0	0	1	1	0	0	1	1	1	1	1	1
fliA	Z3012	b1922	RNA polymerase, sigma 28 (sigma F) factor	1	1	1	1	1	1	1	1	1	1	1	1	1*	1*	1	1	1	1	1	1
fliC	Z3013	b1923	Flagellar filament structural protein (flagellin)	1	1	1	1	1	1	1	1	1	1	1*	1	1	1	1	1	1	1	1	1
fliD	Z3014	b1924	Flagellar filament capping protein	1	1	1	1	1	1	1	1	1	1	1	1	1	1	1	1	1	1	1	1
fliS	Z3015	b1925	Flagellar protein potentiates polymerization	1	1	1	1	1	1	1	1	1	1	1	1	1	1	1	1	1	1	1	1
fliT	Z3016	b1926	Putative flagellar synthesis and assembly chaperone	1	1	1	1	1	1	1	1	1	1	1	1	1	1	1	1	1	1	1	1
fliE	Z3027	b1937	Fagellar basal-body component	1	1	1	1	1	1	1	1	1	1	1	1	1	1	1	1	1	1	1	1
fliF	Z3028	b1938	Flagellar basal-body MS-ring and collar protein	1	1*	1	1	1	1*	1*	1*	1*	1*	1	1	1*	1*	1	1	1	1	1	1
fliG	Z3029	b1939	Flagellar motor switching and energizing component	1	1	1	1	1	1	1	1	1	1	1	1	1	1	1	1	1	1	1	1
fliH	Z3030	b1940	Negative regulator of FliI ATPase activity	1	1	1	1	1	1	1	1	1	1	1	1	1	1	1	1	1	1	1	1
fliI	Z3031	b1941	Flagellum-specific ATP synthase	1	1	1	1	1	1	1	1	1	1	1	1	1	1	1	1	1	1	1	1
fliJ	Z3032	b1942	Flagellar protein	1	1	1	1	1	1	1	1	1	1	1	1	1	1	1	1	1*	1	1	1
fliK	Z3033	b1943	Flagellar hook-length control protein	1	1	1	1	1	1	1*	1	1	1	1	1	1	1	1	1	1	1	1	1
fliL	Z3034	b1944	Flagellar biosynthesis protein	1	1	1	1	1	1	1	1	1	1	1	1	1	1	1	1	1	1	1	1
fliM	Z3035	b1945	Flagellar motor switching and energizing component	1	1	1	1	1	1	1	1	1	1	1	1	1	1	1	1	1	1	1	1
fliN	Z3036	b1946	Flagellar motor switching and energizing component	1	1	1	1	1	1	1	1	1	1	1	1	1	1	1	1	1	1	1	1
fliO	Z3037	b1947	Flagellar biosynthesis protein	1	1	1	1	1	1	1	1	1	1	1	1	1	1	1	1	1	1	1	1
fliP	Z3038	b1948	Flagellar biosynthesis protein	1	1	1	1	1	1	1	1	1	1	1	1	1	1	1	1	1	1	1	1
fliQ	Z3039	b1949	Flagellar biosynthesis protein	1	1	1	1	1	1	1	1	1	1	1	1	1	1	1	1	1	1	1	1
fliR	Z3040	b1950	Flagellar export pore protein	1	1	1	1	1	1	1	1	1	1	1	1	1	1	1	1	1	1	1	1
1: present; 0: absent; *with a mutation
