# Supplementary material for: Conditional expression of flagellar motility, curli fimbriae, and biofilms in Shiga toxin- producing Escherichia albertii
Source: Front Microbiol. 2024 Sep 9;15:1456637. doi: 10.3389/fmicb.2024.1456637 (PMC11420993; doi:10.3389/fmicb.2024.1456637)
Supplement: Supplementary Table 2 — E. albertii secondary flagellar genes. [file Table_2.XLSX]

## Sheet: Table 2
Gene	Locus_tag in E. coli strain 042	Product	RM9973	05-3106	07-3866	54-2045	2010C-3449
lfhA	EC042_RS01320	Flagellar export/assembly protein LfhA	1	1	1	1	1
lfhB	EC042_RS01325	Flagellar type III secretion system protein FlhB	1	1	0	1	1
lfiR	EC042_RS01330	Flagellar biosynthetic protein FliR	1	1	0	1	1
lfiQ	EC042_RS01335	Flagellar biosynthesis protein FliQ	1	1	1	1	1
lfiP	EC042_RS01340	Flagellar biosynthetic protein FliP	1	1	1	1	1
lfiN	EC042_RS01345	Hypothetical protein	1	1	1	1	1
lfiM	EC042_RS01350	Hypothetical protein	1	1	1	1	1
lafK	EC042_RS01355	Sigma-54-dependent Fis family transcriptional regulator	1	1	1	0	0
lfiE	EC042_RS01360	Flagellar hook-basal body protein FliE	1	1	1	0	0
lfiF	EC042_RS01365	Flagellar M-ring protein FliF	1	1	1	0	0
lfiG	EC042_RS01370	Flagellar motor switch protein FliG	1	1	1	0	0
lfiH	EC042_RS01375	Flagellar assembly protein FliH	1	1	1	0	0
lfiI	EC042_RS01380	Flagellum-specific ATP synthase FliI	1	1	1	0	0
lfiJ	EC042_RS01385	Flagellar export protein FliJ	1	1	1	0	0
lfgN	EC042_RS01405	Flagellar protein FlgN	1	1	1	1	1
lfgM	EC042_RS01410	Flagellar biosynthesis anti-sigma factor FlgM	1	1	1	1	1
lfgA	EC042_RS01415	Flagella basal body P-ring formation protein FlgA	1	1	1	1	1
lfgB	EC042_RS01420	FlgB	1	1	1	1	1
lfgC	EC042_RS01425	Flagellar basal body rod protein FlgC	1	1	1	1	1
lfgD	EC042_RS01430	Flagellar hook capping protein LfgD	1	1	1	1	1
lfgE	EC042_RS01435	Flagellar hook protein FlgE	1	1	1	1	1
lfgF	EC042_RS01440	Flagellar basal body rod protein FlgF	1	1	1	1	1
lfgG	EC042_RS01445	Flagellar basal-body rod protein FlgG	1	1	1	1	1
lfgH	EC042_RS01450	Flagellar basal body L-ring protein FlgH	1	1	1	1	1
lfgI	EC042_RS01455	Flagellar basal body P-ring protein FlgI	1	1	1	1	1
lfgJ	EC042_RS01460	Rod-binding protein LfgJ	1	1	1	1	1
lfgK	EC042_RS01465	Flagellar hook-associated protein FlgK	1	1	1	1	1
lfgL	EC042_RS01470	Flagellar hook-associated protein 3 FlgL	1	1	1	1	1
lafA	EC042_RS01495	Lateral flagellin LafA	1	1	1	1	1
lafB	EC042_RS01505	Flagellar hook protein	1	1	1	1	1
lafC	EC042_RS01510	Flagellar export chaperone FliS	1	1	1	1	1
lafD	EC042_RS01515	Hypothetical protein (FliT)	1	1	1	1	1
lafE	EC042_RS01520	Flagellar hook-length control protein FliK	1	1	1	1	1
lafF	EC042_RS01525	Flagellar basal body protein FliL	1	1	1	1	1
lafS	EC042_RS01530	FliA/WhiG family RNA polymerase sigma factor	1	1	1	1	1
lafT	EC042_RS01535	Flagellar motor stator protein MotA	1	1	1	1	1
lafU	EC042_RS01540	Putative lateral flagellar export/assembly protein LafU	1	1	1	1	1
1: present; 0: absent
