# Supplementary material for: Conditional expression of flagellar motility, curli fimbriae, and biofilms in Shiga toxin- producing Escherichia albertii
Source: Front Microbiol. 2024 Sep 9;15:1456637. doi: 10.3389/fmicb.2024.1456637 (PMC11420993; doi:10.3389/fmicb.2024.1456637)
Supplement: Supplementary Table 3 — E. albertii fimbrial and non-fimbrial adhesin genes. [file Table_3.XLSX]

## Sheet: Table 3
Adherence factors	Related genes	Reference strain (GenBank accession number)	Locus tag	RM9973	RM9974	RM9976	RM10507	RM10705	RM15112	RM15113	RM15114	RM15115	RM15116	2011C-4180	2012EL-1823B	2014C-4015	2014EL-1348	05-3106	07-3866	54-2045	2010C-3449	2013C-4143	2014C-4356
Aggregative adherence fimbriae	agg3D	EAEC str. 55989 plasmid pAA (NC_011752.1)	HXF66_RS00410	0	0	0	0	0	0	0	0	0	0	0	0	0	0	0	0	0	0	0	0
	agg3C		HXF66_RS00405	0	0	0	0	0	0	0	0	0	0	0	0	0	0	0	0	0	0	0	0
	agg3B		HXF66_RS00400	0	0	0	0	0	0	0	0	0	0	0	0	0	0	0	0	0	0	0	0
	agg3A		HXF66_RS00395	0	0	0	0	0	0	0	0	0	0	0	0	0	0	0	0	0	0	0	0
	aggD	StxEAEC str. 2011C-3493 plasmid pAA-EA11 (NC_018666.1)	O3K_RS26240	0	0	0	0	0	0	0	0	0	0	0	0	0	0	0	0	0	0	0	0
	aggC		O3K_RS26235	0	0	0	0	0	0	0	0	0	0	0	0	0	0	0	0	0	0	0	0
	aggB		O3K_RS26230	0	0	0	0	0	0	0	0	0	0	0	0	0	0	0	0	0	0	0	0
	aggA		O3K_RS26225	0	0	0	0	0	0	0	0	0	0	0	0	0	0	0	0	0	0	0	0
	aggR		O3K_RS26145	0	0	0	0	0	0	0	0	0	0	0	0	0	0	0	0	0	0	0	0
Adhesive fimbriae	cfaA	EHEC str. 12009 (NC_013353)	ECO103_RS20275	0	1	0	0	1	1	1	1	1	1	0	1	1	1	0	0	0	0	0	0
	cfaB		ECO103_RS20270	0	1	0	0	1	1*	1*	1*	1*	1*	0	1	1*	1*	0	0	0	0	0	0
	cfaC		ECO103_RS20265	0	1	0	0	1	1	1	1	1	1	0	1*	1	1	0	0	0	0	0	0
	cfaD/cfaE		ECO103_RS20260	0	1*	0	0	1	1	1*	1*	1	1	0	1	1	1	0	0	0	0	0	0
	faeC	ETEC str. UMNK88 pUMNK88_K88 (NC_017639.1)	UMNK88_RS26480	0	0	0	0	0	0	0	0	0	0	0	0	0	0	0	1	0	0	0	1
	faeD		UMNK88_RS26485	0	0	0	0	0	0	0	0	0	0	0	0	0	0	0	1*	0	0	0	1
	faeE		UMNK88_RS26490	0	0	0	0	0	0	0	0	0	0	0	0	0	0	0	1	0	0	0	1
	faeF		UMNK88_RS26495	0	0	0	0	0	0	0	0	0	0	0	0	0	0	0	1	0	0	0	1
	faeG		UMNK88_RS26500	0	0	0	0	0	0	0	0	0	0	0	0	0	0	0	1	0	0	0	1
	faeH		UMNK88_RS26505	0	0	0	0	0	0	0	0	0	0	0	0	0	0	0	1	0	0	0	1
	faeI		UMNK88_RS26510	0	0	0	0	0	0	0	0	0	0	0	0	0	0	0	1	0	0	0	1*
	faeJ		UMNK88_RS26515	0	0	0	0	0	0	0	0	0	0	0	0	0	0	0	0	0	0	0	1
Afimbrial adhesin AFA-I	afaA	UPEC str. VR50 (NZ_CP011134.1)	ECVR50_RS16510	0	0	0	0	0	0	0	0	0	0	0	0	0	0	0	0	0	0	0	0
	afaB		ECVR50_RS16505	0	0	0	0	0	0	0	0	0	0	0	0	0	0	0	0	0	0	0	0
	afaC		ECVR50_RS16500	0	0	0	0	0	0	0	0	0	0	0	0	0	0	0	0	0	0	0	0
	afaD		ECVR50_RS16495	0	0	0	0	0	0	0	0	0	0	0	0	0	0	0	0	0	0	0	0
	afaP		ECVR50_RS16490	0	0	0	0	0	0	0	0	0	0	0	0	0	0	0	0	0	0	0	0
	draE		ECVR50_RS16485	0	0	0	0	0	0	0	0	0	0	0	0	0	0	0	0	0	0	0	0
Curli fimbriae	cgsG	Escherichia coli str. K-12 substr. MG1655 (NC_000913.3)	b1037	1	1	1	1	1	1	1	1	1	1	1	1	1	1	1	1	1	1	1	1
	cgsF		b1038	1	1	1	1	1	1	1	1	1	1	1	1	1	1	1	1	1	1*	1	1
	cgsE		b1039	1	1	1	1	1	1	1	1	1	1	1	1	1	1	1	1	1	0	1	1
	cgsD		b1040	1	1	1	1	1	1	1	1	1	1	1	1	1	1	1	1	1	1*	1	1
	csgB		b1041	1	1	1	1	1	1	1	1	1	1	1	1	1	1	1	1	1	1	1	1
	csgA		b1042	1	1	1	1	1	1	1	1	1	1	1	1	1	1	1	1	1	1*	1	1
	csgC		b1043	1	1	1	1	1	1	1	1	1	1	1	1	1	1	1	1	1	1	1	1
E. coli laminin-binding fimbriae (ELF)	elfA	EHEC str. 11368 (NC_013361.1)	ECO26_RS05610	0	0	0	0	0	0	0	0	0	0	0	0	0	0	0	0	0	0	0	0
	elfD		ECO26_RS05615	0	0	0	0	0	0	0	0	0	0	0	0	0	0	0	0	0	0	0	0
	elfC		ECO26_RS05620	0	0	0	0	0	0	0	0	0	0	0	0	0	0	0	0	0	0	0	0
	elfG		ECO26_RS05625	0	0	0	0	0	0	0	0	0	0	0	0	0	0	0	0	0	0	0	0
E. coli common pilus (ECP)	ecpR	StxEAEC str. 2011C-3493 (NC_018658.1)	O3K_RS20165	0	0	0	0	0	0	0	0	0	0	0	0	0	0	0	0	0	0	0	0
	ecpA		O3K_RS20170	0	0	0	0	0	0	0	0	0	0	0	0	0	0	0	0	0	0	0	0
	ecpB		O3K_RS20175	0	0	0	0	0	0	0	0	0	0	0	0	0	0	0	0	0	0	0	0
	ecpC		O3K_RS20180	0	0	0	0	0	0	0	0	0	0	0	0	0	0	0	0	0	0	0	0
	ecpD		O3K_RS20185	0	0	0	0	0	0	0	0	0	0	0	0	0	0	0	0	0	0	0	0
	ecpE		O3K_RS20190	0	0	0	0	0	0	0	0	0	0	0	0	0	0	0	0	0	0	0	0
F1C fimbriae	focA	UPEC str. CFT073 (NC_004431.1)	C_RS05815	0	0	0	0	0	0	0	0	0	0	0	0	0	0	0	0	0	0	0	0
	focI		C_RS05820	0	0	0	0	0	0	0	0	0	0	0	0	0	0	0	0	0	0	0	0
	focC		C_RS05825	0	0	0	0	0	0	0	0	0	0	0	0	0	0	0	0	0	0	0	0
	focD		C_RS05830	0	0	0	0	0	0	0	0	0	0	0	0	0	0	0	0	0	0	0	0
	focF		C_RS05835	0	0	0	0	0	0	0	0	0	0	0	0	0	0	0	0	0	0	0	0
	focG		C_RS05840	0	0	0	0	0	0	0	0	0	0	0	0	0	0	0	0	0	0	0	0
	focH		C_RS05845	0	0	0	0	0	0	0	0	0	0	0	0	0	0	0	0	0	0	0	0
Hemorrhagic E. coli pilus (HCP)	hcpA	EHEC str. EDL933 (NC_002655.2)	Z_RS00570	1	1	1	1	1	1	1	1	1	1	1	1	1	1	1	1	1	1	1	1
	hcpB		Z_RS00565	1	1	1	1	1	1*	1*	1*	1*	1*	1	1	1*	1*	1	1	1	1	1	1
	hcpC		Z_RS00560	1	1	1	1	1	1	1	1	1	1	1	1*	1	1	1	1	1	1	1	1
P fimbriae	papX	UPEC str. UTI89 (NC_007946.1)	UTI89_RS23655	0	0	0	0	0	0	0	0	0	0	0	0	0	0	0	0	0	0	0	0
	papG		UTI89_RS23660	0	0	0	0	0	0	0	0	0	0	0	0	0	0	0	0	0	0	0	0
	papF		UTI89_RS23665	0	0	0	0	0	0	0	0	0	0	0	0	0	0	0	0	0	0	0	0
	papE		UTI89_RS23670	0	0	0	0	0	1	1	1	1	1	0	0	1	1	0	0	0	0	0	0
	papK		UTI89_RS23675	0	0	0	0	0	1	1	1	1	1	0	0	1	1	0	0	0	0	0	0
	papJ		UTI89_RS23680	0	0	0	0	0	1	1	1	1	1	0	0	1	1	0	0	0	0	0	1
	papD		UTI89_RS23685	0	0	0	0	0	1	1	1	1	1	0	1	1	1	0	0	0	0	0	1
	papC		UTI89_RS23690	0	0	0	0	0	1*	1	1	1	1	0	1	1	1	0	0	0	0	0	1
	papH		UTI89_RS23695	0	0	0	0	0	1	1	1	1	1	0	1	1	1	0	0	0	0	0	1
	papA		UTI89_RS23700	0	0	0	0	0	1	1	1	1	1	0	1	1	1	0	0	0	0	0	1
	papB		UTI89_RS23705	0	0	0	0	0	0	0	0	0	0	0	0	0	0	0	0	0	0	0	0
	papI		UTI89_RS23715	0	0	0	0	0	0	0	0	0	0	0	0	0	0	0	0	0	0	0	0
S fimbriae	sfaC	AIEC str. UM146 (NC_017632.1)	UM146_RS12845	0	0	0	0	0	0	0	0	0	0	0	0	0	0	0	0	0	0	0	0
	sfaB		UM146_RS12840	0	0	0	0	0	0	0	0	0	0	0	0	0	0	0	0	0	0	0	0
	sfaA		UM146_RS12835	0	0	0	0	0	0	0	0	0	0	0	0	0	0	0	0	0	0	0	0
	sfaD		UM146_RS12830	0	0	0	0	0	0	0	0	0	0	0	0	0	0	0	0	0	0	0	0
	sfaE		UM146_RS12825	0	0	0	0	0	0	0	0	0	0	0	0	0	0	0	0	0	0	0	0
	sfaF		UM146_RS12820	0	0	0	0	0	0	0	0	0	0	0	0	0	0	0	0	0	0	0	0
	sfaG		UM146_RS12815	0	0	0	0	0	0	0	0	0	0	0	0	0	0	0	0	0	0	0	0
	sfaS		UM146_RS12810	0	0	0	0	0	0	0	0	0	0	0	0	0	0	0	0	0	0	0	0
	sfaH		UM146_RS12805	0	0	0	0	0	0	0	0	0	0	0	0	0	0	0	0	0	0	0	0
	sfaY		UM146_RS12800	0	0	0	0	0	0	0	0	0	0	0	0	0	0	0	0	0	0	0	0
Type 1 fimbriae	fimB	EHEC str. EDL933 (NC_002655.2)	Z_RS27690	1	1	1	1	1	1	1	1	1	1	1	1	1	1	1	1	1	1*	1	1
	fimE		Z_RS27695	1	1	1	1	1	1	1	1	1	1	1	1	1	1	1	1	1	1*	1	1
	fimA		Z_RS27705	1	1	1	1	1	1	1	1	1	1	1	1	1	1	1	1	1	1*	1	1
	fimI		Z_RS27710	1	1	1	1	1	1	1	1	1	1	1	1	1	1	1	1	1	1	1	1
	fimC		Z_RS27715	1	1	1	1	1	1	1	1	1	1	1	1	1	1	1	1	1	1*	1	1
	fimD		Z_RS27720	1	1	1	1	1	1	1	1	1	1	1	1	1	1	1	1	1*	1*	1	1
	fimF		Z_RS27725	1	1	1	1	1	1	1	1	1	1	1	1	1	1	1	1	1	1	1	1
	fimG		Z_RS27730	1	1	1	1	1	1	1	1	1	1	1	1	1	1	1	1	1	1	1	1
	fimH		Z_RS27735	1	1	1	1	1	1	1	1	1	1	1	1	1	1	1	1	1	1	1	1
Sfm fimbriae	sfmA	EHEC strain EDL933	Z0686	1	1	1	1	1	1	1	1	1	1	1	1	1	1	1	1	1	1	1	1
	sfmC		Z0688	1	1	1	1	1	1	1	1	1	1	1*	1	1	1	1	1	0	0	1	1
	sfmD		Z0689	1	1	1	1	1	1*	1*	1*	1*	1*	1	1	1*	1*	1	1	0	0	1	1
	sfmH		Z0690	1	1	1	1	1*	1	1	1	1	1	1	1	1	1	1	1	0	0	1	1
	sfmF		Z0691	1	1	1	1	1	1	1	1	1	1	1	1	1	1	1	1	0	1*	1	1
	sfmZ		Z0693	1	1	1	1	1	1	1	1	1	1	1	1	1*	1*	1	1	0	1*	1	1
Protein Adhesins
AatA, AIDA-I type	aatA	APEC str. O1 plasmid pAPEC-O1-ColBM (NC_009837.1)	APECO1_RS26165	0	0	0	0	0	0	0	0	0	0	1	0	0	0	0	0	0	0	0	0
AIDA-I	aidA	UPEC str. EC958 (NZ_HG941718.1)	EC958_RS21030	0	0	0	0	0	0	0	0	0	0	0	0	0	0	0	0	0	1+2*	0	0
Antigen 43, AIDA-I type	agn43	Escherichia coli str. K-12 substr. MG1655 (NC_000913.3)	b2000	0	0	0	0	0	0	0	0	0	0	0	0	0	0	0	0	0	1	0	0
Cah, AIDA-I type	cah	EHEC str. EDL933 (NC_002655.2)	Z_RS05535	0	0	1	0	0	0	0	0	0	0	0	0	0	0	0	0	0	1*	0	0
EaeH/FdeC	eaeH/fdeC	EHEC str. EDL933 (NC_002655.2)	Z_RS01730	1	1	1	1*	1*	1	1	1	1	1	1*	1	1	1	1	1	1	1	1	1
Enteroaggregative immunoglobulin repeat protein	eaeX/air	EAEC str. 042 (NC_017626.1)	EC042_RS21320	0	0	0	0	0	0	0	0	0	0	0	0	0	0	0	0	0	0	0	0
EhaA, AIDA-I type	ehaA	EHEC str. EDL933 (NC_002655.2)	Z_RS01845	1	1*	1	1	1*	1*	1*	1*	1*	1*	1*	1	1	1	1*	1	0	0	0	1
EhaB, AIDA-I type	ehaB	EHEC str. EDL933 (NC_002655.2)	Z_RS02155	1	1	1	1*	1*	1	1	1	1	1	1*	1	1	1	1	1	1	1	1*	1
EhaC/YfaL, AIDA-I family autotransporter adhesin	ehaC/yfaL			1	1	1	1	1*	1	1	1	1	1	1	1	1	1	1	1	1	1*	1	1
EhaG/UpaG adhesin, trimeric AT	ehaG/upaG	EHEC str. 12009 (NC_013353)	ECO103_RS24220	1	1*	1	1*	1*	1*	1*	1*	1*	1*	1	1*	1*	1*	1	1	1	1*	1*	1
EtpA	etpA	ETEC str. H10407 plasmid p948 (NC_017724.1)	ETEC_RS30895	0	0	0	0	0	0	0	0	0	0	0	0	0	0	0	0	0	0	0	0
Paa	paa	EHEC str. 12009 (NC_013353)	ECO103_RS08940	1	1	1	1	1	1	1	1	1	1	1	1	1	1	1	1	1	0	1	1
AIDA-I type	tibA	ETEC str. H10407 (NC_017633.1)	ETEC_RS11690	0	0	0	0	0	0	0	0	0	0	0	0	0	0	0	0	0	0	0	0
UpaH, AIDA-I type	upaH	UPEC str. 536 (NC_008253.1)	ECP_RS07185	1	1	0	1	1	1*	1*	1*	1*	1*	0	0	1*	1*	0	1*	0	0	0	1
Bifunctional siderophore receptor/adhesin Iha	iha			0	0	0	0	0	0	0	0	0	0	0	0	0	0	0	0	1	1	0	0
Intimin-like inverse autotransporter SinH	sinH			1	1	1	1*	1	1	1	1	1*	1	1	1*	1	1	1	1	1	1*	1*	1
1: present; 0: absent; *with a mutation
