# Supplementary material for: Conditional expression of flagellar motility, curli fimbriae, and biofilms in Shiga toxin- producing Escherichia albertii
Source: Front Microbiol. 2024 Sep 9;15:1456637. doi: 10.3389/fmicb.2024.1456637 (PMC11420993; doi:10.3389/fmicb.2024.1456637)
Supplement: Supplementary Table 4 — Statistical analyses of E. albertii biofilms. [file Table_4.XLSX]

## Sheet: 24 h
Tukey's multiple comparisons test	Mean Diff.	95.00% CI of diff.	Below threshold?	Summary	Adjusted P Value
RM15115 vs. 2012EL-1823B	-0.1987	-0.3263 to -0.07098	Yes	***	0.0001
2014EL-1348 vs. 2013C-4143	0.1977	0.06998 to 0.3253	Yes	***	0.0001
RM10507 vs. 2014EL-1348	-0.1927	-0.3203 to -0.06498	Yes	***	0.0002
RM10705 vs. 2012EL-1823B	-0.193	-0.3207 to -0.06532	Yes	***	0.0002
RM15116 vs. 2012EL-1823B	-0.1937	-0.3213 to -0.06598	Yes	***	0.0002
RM15114 vs. 2014EL-1348	-0.1877	-0.3153 to -0.05998	Yes	***	0.0003
2014EL-1348 vs. 54-2045	0.1837	0.05598 to 0.3113	Yes	***	0.0004
RM15113 vs. 2012EL-1823B	-0.1797	-0.3073 to -0.05198	Yes	***	0.0006
2014C-4015 vs. 07-3866	-0.1767	-0.3043 to -0.04898	Yes	***	0.0008
RM9976 vs. 2014EL-1348	-0.172	-0.2997 to -0.04432	Yes	**	0.0012
2012EL-1823B vs. 2014C-4536	0.1713	0.04365 to 0.2990	Yes	**	0.0013
RM15115 vs. 2014EL-1348	-0.1677	-0.2953 to -0.03998	Yes	**	0.0018
RM15116 vs. 2014EL-1348	-0.1627	-0.2903 to -0.03498	Yes	**	0.0028
RM10705 vs. 2014EL-1348	-0.162	-0.2897 to -0.03432	Yes	**	0.003
RM15113 vs. 2014EL-1348	-0.1487	-0.2763 to -0.02098	Yes	**	0.0094
RM15112 vs. 2012EL-1823B	-0.1477	-0.2753 to -0.01998	Yes	*	0.0102
2014EL-1348 vs. 2014C-4536	0.1403	0.01265 to 0.2680	Yes	*	0.0187
RM9973 vs. RM9974	-0.7833	-0.9110 to -0.6557	Yes	****	<0.0001
RM9973 vs. 2012EL-1823B	-0.2357	-0.3633 to -0.1080	Yes	****	<0.0001
RM9973 vs. 2014C-4015	-0.734	-0.8617 to -0.6063	Yes	****	<0.0001
RM9973 vs. 2014EL-1348	-0.2047	-0.3323 to -0.07698	Yes	****	<0.0001
RM9973 vs. 07-3866	-0.9107	-1.038 to -0.7830	Yes	****	<0.0001
RM9974 vs. RM9976	0.7507	0.6230 to 0.8783	Yes	****	<0.0001
RM9974 vs. RM10507	0.7713	0.6437 to 0.8990	Yes	****	<0.0001
RM9974 vs. RM10705	0.7407	0.6130 to 0.8683	Yes	****	<0.0001
RM9974 vs. RM15112	0.6953	0.5677 to 0.8230	Yes	****	<0.0001
RM9974 vs. RM15113	0.7273	0.5997 to 0.8550	Yes	****	<0.0001
RM9974 vs. RM15114	0.7663	0.6387 to 0.8940	Yes	****	<0.0001
RM9974 vs. RM15115	0.7463	0.6187 to 0.8740	Yes	****	<0.0001
RM9974 vs. RM15116	0.7413	0.6137 to 0.8690	Yes	****	<0.0001
RM9974 vs. 2011C-4180	0.7957	0.6680 to 0.9233	Yes	****	<0.0001
RM9974 vs. 2012EL-1823B	0.5477	0.4200 to 0.6753	Yes	****	<0.0001
RM9974 vs. 2014EL-1348	0.5787	0.4510 to 0.7063	Yes	****	<0.0001
RM9974 vs. 05-3106	0.7923	0.6647 to 0.9200	Yes	****	<0.0001
RM9974 vs. 54-2045	0.7623	0.6347 to 0.8900	Yes	****	<0.0001
RM9974 vs. 2010C-3449	0.7893	0.6617 to 0.9170	Yes	****	<0.0001
RM9974 vs. 2013C-4143	0.7763	0.6487 to 0.9040	Yes	****	<0.0001
RM9974 vs. 2014C-4536	0.719	0.5913 to 0.8467	Yes	****	<0.0001
RM9976 vs. 2012EL-1823B	-0.203	-0.3307 to -0.07532	Yes	****	<0.0001
RM9976 vs. 2014C-4015	-0.7013	-0.8290 to -0.5737	Yes	****	<0.0001
RM9976 vs. 07-3866	-0.878	-1.006 to -0.7503	Yes	****	<0.0001
RM10507 vs. 2012EL-1823B	-0.2237	-0.3513 to -0.09598	Yes	****	<0.0001
RM10507 vs. 2014C-4015	-0.722	-0.8497 to -0.5943	Yes	****	<0.0001
RM10507 vs. 07-3866	-0.8987	-1.026 to -0.7710	Yes	****	<0.0001
RM10705 vs. 2014C-4015	-0.6913	-0.8190 to -0.5637	Yes	****	<0.0001
RM10705 vs. 07-3866	-0.868	-0.9957 to -0.7403	Yes	****	<0.0001
RM15112 vs. 2014C-4015	-0.646	-0.7737 to -0.5183	Yes	****	<0.0001
RM15112 vs. 07-3866	-0.8227	-0.9503 to -0.6950	Yes	****	<0.0001
RM15113 vs. 2014C-4015	-0.678	-0.8057 to -0.5503	Yes	****	<0.0001
RM15113 vs. 07-3866	-0.8547	-0.9823 to -0.7270	Yes	****	<0.0001
RM15114 vs. 2012EL-1823B	-0.2187	-0.3463 to -0.09098	Yes	****	<0.0001
RM15114 vs. 2014C-4015	-0.717	-0.8447 to -0.5893	Yes	****	<0.0001
RM15114 vs. 07-3866	-0.8937	-1.021 to -0.7660	Yes	****	<0.0001
RM15115 vs. 2014C-4015	-0.697	-0.8247 to -0.5693	Yes	****	<0.0001
RM15115 vs. 07-3866	-0.8737	-1.001 to -0.7460	Yes	****	<0.0001
RM15116 vs. 2014C-4015	-0.692	-0.8197 to -0.5643	Yes	****	<0.0001
RM15116 vs. 07-3866	-0.8687	-0.9963 to -0.7410	Yes	****	<0.0001
2011C-4180 vs. 2012EL-1823B	-0.248	-0.3757 to -0.1203	Yes	****	<0.0001
2011C-4180 vs. 2014C-4015	-0.7463	-0.8740 to -0.6187	Yes	****	<0.0001
2011C-4180 vs. 2014EL-1348	-0.217	-0.3447 to -0.08932	Yes	****	<0.0001
2011C-4180 vs. 07-3866	-0.923	-1.051 to -0.7953	Yes	****	<0.0001
2012EL-1823B vs. 2014C-4015	-0.4983	-0.6260 to -0.3707	Yes	****	<0.0001
2012EL-1823B vs. 05-3106	0.2447	0.1170 to 0.3723	Yes	****	<0.0001
2012EL-1823B vs. 07-3866	-0.675	-0.8027 to -0.5473	Yes	****	<0.0001
2012EL-1823B vs. 54-2045	0.2147	0.08698 to 0.3423	Yes	****	<0.0001
2012EL-1823B vs. 2010C-3449	0.2417	0.1140 to 0.3693	Yes	****	<0.0001
2012EL-1823B vs. 2013C-4143	0.2287	0.1010 to 0.3563	Yes	****	<0.0001
2014C-4015 vs. 2014EL-1348	0.5293	0.4017 to 0.6570	Yes	****	<0.0001
2014C-4015 vs. 05-3106	0.743	0.6153 to 0.8707	Yes	****	<0.0001
2014C-4015 vs. 54-2045	0.713	0.5853 to 0.8407	Yes	****	<0.0001
2014C-4015 vs. 2010C-3449	0.74	0.6123 to 0.8677	Yes	****	<0.0001
2014C-4015 vs. 2013C-4143	0.727	0.5993 to 0.8547	Yes	****	<0.0001
2014C-4015 vs. 2014C-4536	0.6697	0.5420 to 0.7973	Yes	****	<0.0001
2014EL-1348 vs. 05-3106	0.2137	0.08598 to 0.3413	Yes	****	<0.0001
2014EL-1348 vs. 07-3866	-0.706	-0.8337 to -0.5783	Yes	****	<0.0001
2014EL-1348 vs. 2010C-3449	0.2107	0.08298 to 0.3383	Yes	****	<0.0001
05-3106 vs. 07-3866	-0.9197	-1.047 to -0.7920	Yes	****	<0.0001
07-3866 vs. 54-2045	0.8897	0.7620 to 1.017	Yes	****	<0.0001
07-3866 vs. 2010C-3449	0.9167	0.7890 to 1.044	Yes	****	<0.0001
07-3866 vs. 2013C-4143	0.9037	0.7760 to 1.031	Yes	****	<0.0001
07-3866 vs. 2014C-4536	0.8463	0.7187 to 0.9740	Yes	****	<0.0001
Compact letter display
07-3866	A
RM9974	A B
2014C-4015	B
2012EL-1823B	C
2014EL-1348	C D
RM15112	D E
2014C-4536	E
RM15113	E
RM10705	E
RM15116	E
RM15115	E
RM9976	E
54-2045	E
RM15114	E
RM10507	E
2013C-4143	E
RM9973	E
2010C-3449	E
05-3106	E
2011C-4180	E

## Sheet: 48 h
Tukey's multiple comparisons test	Mean Diff.	95.00% CI of diff.	Below threshold?	Summary	Adjusted P Value
2014EL-1348 vs. 07-3866	-0.84	-1.663 to -0.01722	Yes	*	0.0409
RM9974 vs. 07-3866	-1.005	-1.828 to -0.1822	Yes	**	0.0051
RM9973 vs. RM9974	-3.499	-4.321 to -2.676	Yes	****	<0.0001
RM9973 vs. 2012EL-1823B	-2.147	-2.970 to -1.324	Yes	****	<0.0001
RM9973 vs. 2014C-4015	-3.994	-4.816 to -3.171	Yes	****	<0.0001
RM9973 vs. 2014EL-1348	-3.664	-4.486 to -2.841	Yes	****	<0.0001
RM9973 vs. 07-3866	-4.504	-5.326 to -3.681	Yes	****	<0.0001
RM9974 vs. RM9976	3.492	2.669 to 4.314	Yes	****	<0.0001
RM9974 vs. RM10507	3.506	2.684 to 4.329	Yes	****	<0.0001
RM9974 vs. RM10705	3.424	2.602 to 4.247	Yes	****	<0.0001
RM9974 vs. RM15112	3.549	2.726 to 4.371	Yes	****	<0.0001
RM9974 vs. RM15113	3.499	2.677 to 4.322	Yes	****	<0.0001
RM9974 vs. RM15114	3.558	2.735 to 4.381	Yes	****	<0.0001
RM9974 vs. RM15115	3.509	2.686 to 4.332	Yes	****	<0.0001
RM9974 vs. RM15116	3.479	2.656 to 4.301	Yes	****	<0.0001
RM9974 vs. 2011C-4180	3.517	2.694 to 4.339	Yes	****	<0.0001
RM9974 vs. 2012EL-1823B	1.352	0.5289 to 2.174	Yes	****	<0.0001
RM9974 vs. 05-3106	3.563	2.740 to 4.386	Yes	****	<0.0001
RM9974 vs. 54-2045	3.563	2.740 to 4.386	Yes	****	<0.0001
RM9974 vs. 2010C-3449	3.563	2.740 to 4.386	Yes	****	<0.0001
RM9974 vs. 2013C-4143	3.544	2.721 to 4.366	Yes	****	<0.0001
RM9974 vs. 2014C-4536	3.484	2.661 to 4.306	Yes	****	<0.0001
RM9976 vs. 2012EL-1823B	-2.14	-2.963 to -1.317	Yes	****	<0.0001
RM9976 vs. 2014C-4015	-3.987	-4.809 to -3.164	Yes	****	<0.0001
RM9976 vs. 2014EL-1348	-3.657	-4.479 to -2.834	Yes	****	<0.0001
RM9976 vs. 07-3866	-4.497	-5.319 to -3.674	Yes	****	<0.0001
RM10507 vs. 2012EL-1823B	-2.155	-2.977 to -1.332	Yes	****	<0.0001
RM10507 vs. 2014C-4015	-4.001	-4.824 to -3.179	Yes	****	<0.0001
RM10507 vs. 2014EL-1348	-3.671	-4.494 to -2.849	Yes	****	<0.0001
RM10507 vs. 07-3866	-4.511	-5.334 to -3.689	Yes	****	<0.0001
RM10705 vs. 2012EL-1823B	-2.073	-2.895 to -1.250	Yes	****	<0.0001
RM10705 vs. 2014C-4015	-3.919	-4.742 to -3.097	Yes	****	<0.0001
RM10705 vs. 2014EL-1348	-3.589	-4.412 to -2.767	Yes	****	<0.0001
RM10705 vs. 07-3866	-4.429	-5.252 to -3.607	Yes	****	<0.0001
RM15112 vs. 2012EL-1823B	-2.197	-3.020 to -1.374	Yes	****	<0.0001
RM15112 vs. 2014C-4015	-4.044	-4.866 to -3.221	Yes	****	<0.0001
RM15112 vs. 2014EL-1348	-3.714	-4.536 to -2.891	Yes	****	<0.0001
RM15112 vs. 07-3866	-4.554	-5.376 to -3.731	Yes	****	<0.0001
RM15113 vs. 2012EL-1823B	-2.148	-2.970 to -1.325	Yes	****	<0.0001
RM15113 vs. 2014C-4015	-3.994	-4.817 to -3.172	Yes	****	<0.0001
RM15113 vs. 2014EL-1348	-3.664	-4.487 to -2.842	Yes	****	<0.0001
RM15113 vs. 07-3866	-4.504	-5.327 to -3.682	Yes	****	<0.0001
RM15114 vs. 2012EL-1823B	-2.206	-3.029 to -1.384	Yes	****	<0.0001
RM15114 vs. 2014C-4015	-4.053	-4.876 to -3.230	Yes	****	<0.0001
RM15114 vs. 2014EL-1348	-3.723	-4.546 to -2.900	Yes	****	<0.0001
RM15114 vs. 07-3866	-4.563	-5.386 to -3.740	Yes	****	<0.0001
RM15115 vs. 2012EL-1823B	-2.157	-2.980 to -1.335	Yes	****	<0.0001
RM15115 vs. 2014C-4015	-4.004	-4.827 to -3.181	Yes	****	<0.0001
RM15115 vs. 2014EL-1348	-3.674	-4.497 to -2.851	Yes	****	<0.0001
RM15115 vs. 07-3866	-4.514	-5.337 to -3.691	Yes	****	<0.0001
RM15116 vs. 2012EL-1823B	-2.127	-2.950 to -1.304	Yes	****	<0.0001
RM15116 vs. 2014C-4015	-3.974	-4.796 to -3.151	Yes	****	<0.0001
RM15116 vs. 2014EL-1348	-3.644	-4.466 to -2.821	Yes	****	<0.0001
RM15116 vs. 07-3866	-4.484	-5.306 to -3.661	Yes	****	<0.0001
2011C-4180 vs. 2012EL-1823B	-2.165	-2.988 to -1.342	Yes	****	<0.0001
2011C-4180 vs. 2014C-4015	-4.012	-4.834 to -3.189	Yes	****	<0.0001
2011C-4180 vs. 2014EL-1348	-3.682	-4.504 to -2.859	Yes	****	<0.0001
2011C-4180 vs. 07-3866	-4.522	-5.344 to -3.699	Yes	****	<0.0001
2012EL-1823B vs. 2014C-4015	-1.847	-2.669 to -1.024	Yes	****	<0.0001
2012EL-1823B vs. 2014EL-1348	-1.517	-2.339 to -0.6939	Yes	****	<0.0001
2012EL-1823B vs. 05-3106	2.211	1.389 to 3.034	Yes	****	<0.0001
2012EL-1823B vs. 07-3866	-2.357	-3.179 to -1.534	Yes	****	<0.0001
2012EL-1823B vs. 54-2045	2.211	1.389 to 3.034	Yes	****	<0.0001
2012EL-1823B vs. 2010C-3449	2.211	1.389 to 3.034	Yes	****	<0.0001
2012EL-1823B vs. 2013C-4143	2.192	1.369 to 3.015	Yes	****	<0.0001
2012EL-1823B vs. 2014C-4536	2.132	1.309 to 2.955	Yes	****	<0.0001
2014C-4015 vs. 05-3106	4.058	3.235 to 4.881	Yes	****	<0.0001
2014C-4015 vs. 54-2045	4.058	3.235 to 4.881	Yes	****	<0.0001
2014C-4015 vs. 2010C-3449	4.058	3.235 to 4.881	Yes	****	<0.0001
2014C-4015 vs. 2013C-4143	4.039	3.216 to 4.861	Yes	****	<0.0001
2014C-4015 vs. 2014C-4536	3.979	3.156 to 4.801	Yes	****	<0.0001
2014EL-1348 vs. 05-3106	3.728	2.905 to 4.551	Yes	****	<0.0001
2014EL-1348 vs. 54-2045	3.728	2.905 to 4.551	Yes	****	<0.0001
2014EL-1348 vs. 2010C-3449	3.728	2.905 to 4.551	Yes	****	<0.0001
2014EL-1348 vs. 2013C-4143	3.709	2.886 to 4.531	Yes	****	<0.0001
2014EL-1348 vs. 2014C-4536	3.649	2.826 to 4.471	Yes	****	<0.0001
05-3106 vs. 07-3866	-4.568	-5.391 to -3.745	Yes	****	<0.0001
07-3866 vs. 54-2045	4.568	3.745 to 5.391	Yes	****	<0.0001
07-3866 vs. 2010C-3449	4.568	3.745 to 5.391	Yes	****	<0.0001
07-3866 vs. 2013C-4143	4.549	3.726 to 5.371	Yes	****	<0.0001
07-3866 vs. 2014C-4536	4.489	3.666 to 5.311	Yes	****	<0.0001
Compact letter display
07-3866	A
2014C-4015	A B
2014EL-1348	B
RM9974	B
2012EL-1823B	C
RM10705	D
RM15116	D
2014C-4536	D
RM9976	D
RM9973	D
RM15113	D
RM10507	D
RM15115	D
2011C-4180	D
2013C-4143	D
RM15112	D
RM15114	D
2010C-3449	D
05-3106	D
54-2045	D

## Sheet: 120 h
Tukey's multiple comparisons test	Mean Diff.	95.00% CI of diff.	Below threshold?	Summary	Adjusted P Value
RM9973 vs. 07-3866	2.443	0.3244 to 4.562	Yes	*	0.0106
RM9974 vs. 2012EL-1823B	2.266	0.1474 to 4.385	Yes	*	0.0253
RM9976 vs. 07-3866	-2.379	-4.498 to -0.2597	Yes	*	0.0147
2012EL-1823B vs. 2014C-4536	-2.433	-4.552 to -0.3141	Yes	*	0.0112
RM10705 vs. 07-3866	-2.504	-4.623 to -0.3854	Yes	**	0.0078
RM15112 vs. 07-3866	-2.808	-4.927 to -0.6891	Yes	**	0.0016
RM15113 vs. 07-3866	-2.777	-4.896 to -0.6584	Yes	**	0.0019
RM15114 vs. 07-3866	-2.889	-5.008 to -0.7697	Yes	**	0.001
RM15115 vs. 07-3866	-2.795	-4.914 to -0.6761	Yes	**	0.0017
RM15116 vs. 07-3866	-2.795	-4.914 to -0.6764	Yes	**	0.0017
2012EL-1823B vs. 2014C-4015	-2.686	-4.805 to -0.5674	Yes	**	0.003
07-3866 vs. 2013C-4143	2.873	0.7544 to 4.992	Yes	**	0.0011
RM9973 vs. RM9974	-3.137	-5.256 to -1.018	Yes	***	0.0003
RM9973 vs. 2014C-4536	-3.303	-5.422 to -1.184	Yes	***	0.0001
RM10507 vs. 07-3866	-2.96	-5.079 to -0.8407	Yes	***	0.0007
2011C-4180 vs. 07-3866	-2.905	-5.024 to -0.7857	Yes	***	0.0009
05-3106 vs. 07-3866	-2.96	-5.079 to -0.8407	Yes	***	0.0007
07-3866 vs. 54-2045	2.942	0.8231 to 5.061	Yes	***	0.0008
07-3866 vs. 2010C-3449	2.959	0.8397 to 5.078	Yes	***	0.0007
RM9973 vs. RM9976	4.822	2.703 to 6.941	Yes	****	<0.0001
RM9973 vs. RM10507	5.403	3.284 to 7.522	Yes	****	<0.0001
RM9973 vs. RM10705	4.948	2.829 to 7.067	Yes	****	<0.0001
RM9973 vs. RM15112	5.251	3.132 to 7.370	Yes	****	<0.0001
RM9973 vs. RM15113	5.221	3.102 to 7.340	Yes	****	<0.0001
RM9973 vs. RM15114	5.332	3.213 to 7.451	Yes	****	<0.0001
RM9973 vs. RM15115	5.238	3.119 to 7.357	Yes	****	<0.0001
RM9973 vs. RM15116	5.239	3.120 to 7.358	Yes	****	<0.0001
RM9973 vs. 2011C-4180	5.348	3.229 to 7.467	Yes	****	<0.0001
RM9973 vs. 2014C-4015	-3.557	-5.676 to -1.438	Yes	****	<0.0001
RM9973 vs. 05-3106	5.403	3.284 to 7.522	Yes	****	<0.0001
RM9973 vs. 54-2045	5.385	3.266 to 7.504	Yes	****	<0.0001
RM9973 vs. 2010C-3449	5.402	3.283 to 7.521	Yes	****	<0.0001
RM9973 vs. 2013C-4143	5.317	3.198 to 7.436	Yes	****	<0.0001
RM9974 vs. RM9976	7.959	5.840 to 10.08	Yes	****	<0.0001
RM9974 vs. RM10507	8.54	6.421 to 10.66	Yes	****	<0.0001
RM9974 vs. RM10705	8.084	5.965 to 10.20	Yes	****	<0.0001
RM9974 vs. RM15112	8.388	6.269 to 10.51	Yes	****	<0.0001
RM9974 vs. RM15113	8.357	6.238 to 10.48	Yes	****	<0.0001
RM9974 vs. RM15114	8.469	6.350 to 10.59	Yes	****	<0.0001
RM9974 vs. RM15115	8.375	6.256 to 10.49	Yes	****	<0.0001
RM9974 vs. RM15116	8.375	6.256 to 10.49	Yes	****	<0.0001
RM9974 vs. 2011C-4180	8.485	6.366 to 10.60	Yes	****	<0.0001
RM9974 vs. 05-3106	8.54	6.421 to 10.66	Yes	****	<0.0001
RM9974 vs. 07-3866	5.58	3.461 to 7.699	Yes	****	<0.0001
RM9974 vs. 54-2045	8.522	6.403 to 10.64	Yes	****	<0.0001
RM9974 vs. 2010C-3449	8.539	6.420 to 10.66	Yes	****	<0.0001
RM9974 vs. 2013C-4143	8.453	6.334 to 10.57	Yes	****	<0.0001
RM9976 vs. 2012EL-1823B	-5.692	-7.811 to -3.573	Yes	****	<0.0001
RM9976 vs. 2014C-4015	-8.379	-10.50 to -6.260	Yes	****	<0.0001
RM9976 vs. 2014EL-1348	-6.642	-8.761 to -4.523	Yes	****	<0.0001
RM9976 vs. 2014C-4536	-8.125	-10.24 to -6.006	Yes	****	<0.0001
RM10507 vs. 2012EL-1823B	-6.273	-8.392 to -4.154	Yes	****	<0.0001
RM10507 vs. 2014C-4015	-8.96	-11.08 to -6.841	Yes	****	<0.0001
RM10507 vs. 2014EL-1348	-7.223	-9.342 to -5.104	Yes	****	<0.0001
RM10507 vs. 2014C-4536	-8.706	-10.83 to -6.587	Yes	****	<0.0001
RM10705 vs. 2012EL-1823B	-5.818	-7.937 to -3.699	Yes	****	<0.0001
RM10705 vs. 2014C-4015	-8.504	-10.62 to -6.385	Yes	****	<0.0001
RM10705 vs. 2014EL-1348	-6.768	-8.887 to -4.649	Yes	****	<0.0001
RM10705 vs. 2014C-4536	-8.251	-10.37 to -6.132	Yes	****	<0.0001
RM15112 vs. 2012EL-1823B	-6.122	-8.241 to -4.003	Yes	****	<0.0001
RM15112 vs. 2014C-4015	-8.808	-10.93 to -6.689	Yes	****	<0.0001
RM15112 vs. 2014EL-1348	-7.072	-9.191 to -4.953	Yes	****	<0.0001
RM15112 vs. 2014C-4536	-8.555	-10.67 to -6.436	Yes	****	<0.0001
RM15113 vs. 2012EL-1823B	-6.091	-8.210 to -3.972	Yes	****	<0.0001
RM15113 vs. 2014C-4015	-8.777	-10.90 to -6.658	Yes	****	<0.0001
RM15113 vs. 2014EL-1348	-7.041	-9.160 to -4.922	Yes	****	<0.0001
RM15113 vs. 2014C-4536	-8.524	-10.64 to -6.405	Yes	****	<0.0001
RM15114 vs. 2012EL-1823B	-6.202	-8.321 to -4.083	Yes	****	<0.0001
RM15114 vs. 2014C-4015	-8.889	-11.01 to -6.770	Yes	****	<0.0001
RM15114 vs. 2014EL-1348	-7.152	-9.271 to -5.033	Yes	****	<0.0001
RM15114 vs. 2014C-4536	-8.635	-10.75 to -6.516	Yes	****	<0.0001
RM15115 vs. 2012EL-1823B	-6.109	-8.228 to -3.990	Yes	****	<0.0001
RM15115 vs. 2014C-4015	-8.795	-10.91 to -6.676	Yes	****	<0.0001
RM15115 vs. 2014EL-1348	-7.059	-9.178 to -4.940	Yes	****	<0.0001
RM15115 vs. 2014C-4536	-8.542	-10.66 to -6.423	Yes	****	<0.0001
RM15116 vs. 2012EL-1823B	-6.109	-8.228 to -3.990	Yes	****	<0.0001
RM15116 vs. 2014C-4015	-8.795	-10.91 to -6.676	Yes	****	<0.0001
RM15116 vs. 2014EL-1348	-7.059	-9.178 to -4.940	Yes	****	<0.0001
RM15116 vs. 2014C-4536	-8.542	-10.66 to -6.423	Yes	****	<0.0001
2011C-4180 vs. 2012EL-1823B	-6.218	-8.337 to -4.099	Yes	****	<0.0001
2011C-4180 vs. 2014C-4015	-8.905	-11.02 to -6.786	Yes	****	<0.0001
2011C-4180 vs. 2014EL-1348	-7.168	-9.287 to -5.049	Yes	****	<0.0001
2011C-4180 vs. 2014C-4536	-8.651	-10.77 to -6.532	Yes	****	<0.0001
2012EL-1823B vs. 05-3106	6.273	4.154 to 8.392	Yes	****	<0.0001
2012EL-1823B vs. 07-3866	3.314	1.195 to 5.433	Yes	****	<0.0001
2012EL-1823B vs. 54-2045	6.256	4.137 to 8.375	Yes	****	<0.0001
2012EL-1823B vs. 2010C-3449	6.272	4.153 to 8.391	Yes	****	<0.0001
2012EL-1823B vs. 2013C-4143	6.187	4.068 to 8.306	Yes	****	<0.0001
2014C-4015 vs. 05-3106	8.96	6.841 to 11.08	Yes	****	<0.0001
2014C-4015 vs. 07-3866	6	3.881 to 8.119	Yes	****	<0.0001
2014C-4015 vs. 54-2045	8.942	6.823 to 11.06	Yes	****	<0.0001
2014C-4015 vs. 2010C-3449	8.959	6.840 to 11.08	Yes	****	<0.0001
2014C-4015 vs. 2013C-4143	8.873	6.754 to 10.99	Yes	****	<0.0001
2014EL-1348 vs. 05-3106	7.223	5.104 to 9.342	Yes	****	<0.0001
2014EL-1348 vs. 07-3866	4.264	2.145 to 6.383	Yes	****	<0.0001
2014EL-1348 vs. 54-2045	7.206	5.087 to 9.325	Yes	****	<0.0001
2014EL-1348 vs. 2010C-3449	7.222	5.103 to 9.341	Yes	****	<0.0001
2014EL-1348 vs. 2013C-4143	7.137	5.018 to 9.256	Yes	****	<0.0001
05-3106 vs. 2014C-4536	-8.706	-10.83 to -6.587	Yes	****	<0.0001
07-3866 vs. 2014C-4536	-5.747	-7.866 to -3.628	Yes	****	<0.0001
54-2045 vs. 2014C-4536	-8.689	-10.81 to -6.570	Yes	****	<0.0001
2010C-3449 vs. 2014C-4536	-8.705	-10.82 to -6.586	Yes	****	<0.0001
2013C-4143 vs. 2014C-4536	-8.62	-10.74 to -6.501	Yes	****	<0.0001
Compact letter display
2014C-4015	A
2014C-4536	A
RM9974	A
2014EL-1348	A B
2012EL-1823B	B
RM9973	B
07-3866	C
RM9976	D
RM10705	D
RM15113	D
RM15115	D
RM15116	D
RM15112	D
2013C-4143	D
RM15114	D
2011C-4180	D
54-2045	D
2010C-3449	D
05-3106	D
RM10507	D
